# Supplementary material for: Longitudinal Changes in Liver Enzyme Levels Among Transgender People Receiving Gender Affirming Hormone Therapy
Source: PubMed Central journal article supplement — J Sex Med. Author manuscript; Available in PMC 2021 Sep 16. (PMC8444147; doi:10.1016/j.jsxm.2021.06.011), 2021-08-05
Supplement: NIHMS1738085-supplement-Alcohol_related_codes.pdf [file NIHMS1738085-supplement-Alcohol_related_codes.pdf]

| <b>DX</b> |                  |                |                             |                           |
|-----------|------------------|----------------|-----------------------------|---------------------------|
| <b>DX</b> | <b>Frequency</b> | <b>Percent</b> | <b>Cumulative Frequency</b> | <b>Cumulative Percent</b> |
| 291.0     | 274              | 0.30           | 274                         | 0.30                      |
| 291.1     | 26               | 0.03           | 300                         | 0.32                      |
| 291.2     | 93               | 0.10           | 393                         | 0.43                      |
| 291.3     | 28               | 0.03           | 421                         | 0.46                      |
| 291.4     | 4                | 0.00           | 425                         | 0.46                      |
| 291.5     | 7                | 0.01           | 432                         | 0.47                      |
| 291.8     | 74               | 0.08           | 506                         | 0.55                      |
| 291.81    | 2996             | 3.24           | 3502                        | 3.79                      |
| 291.82    | 9                | 0.01           | 3511                        | 3.80                      |
| 291.89    | 82               | 0.09           | 3593                        | 3.89                      |
| 291.9     | 33               | 0.04           | 3626                        | 3.92                      |
| 303       | 1                | 0.00           | 3627                        | 3.92                      |
| 303.0     | 1                | 0.00           | 3628                        | 3.92                      |
| 303.00    | 744              | 0.80           | 4372                        | 4.73                      |
| 303.01    | 241              | 0.26           | 4613                        | 4.99                      |
| 303.02    | 36               | 0.04           | 4649                        | 5.03                      |
| 303.03    | 17               | 0.02           | 4666                        | 5.05                      |
| 303.9     | 6                | 0.01           | 4672                        | 5.05                      |
| 303.90    | 30259            | 32.72          | 34931                       | 37.78                     |
| 303.91    | 1072             | 1.16           | 36003                       | 38.94                     |
| 303.92    | 239              | 0.26           | 36242                       | 39.20                     |
| 303.93    | 9994             | 10.81          | 46236                       | 50.00                     |
| 305.0     | 6                | 0.01           | 46242                       | 50.01                     |
| 305.00    | 22884            | 24.75          | 69126                       | 74.76                     |
| 305.01    | 499              | 0.54           | 69625                       | 75.30                     |
| 305.02    | 590              | 0.64           | 70215                       | 75.94                     |
| 305.03    | 3661             | 3.96           | 73876                       | 79.90                     |
| 571.0     | 127              | 0.14           | 74003                       | 80.03                     |
| 571.1     | 583              | 0.63           | 74586                       | 80.66                     |
| 571.2     | 2579             | 2.79           | 77165                       | 83.45                     |
| 571.3     | 924              | 1.00           | 78089                       | 84.45                     |
| 648.40    | 212              | 0.23           | 78301                       | 84.68                     |
| 648.41    | 1914             | 2.07           | 80215                       | 86.75                     |
| 648.42    | 80               | 0.09           | 80295                       | 86.84                     |
| 648.43    | 882              | 0.95           | 81177                       | 87.79                     |
| 648.44    | 1976             | 2.14           | 83153                       | 89.93                     |

|                |      |      |       |       |
|----------------|------|------|-------|-------|
| <b>F10.10</b>  | 1283 | 1.39 | 84436 | 91.32 |
| <b>F10.120</b> | 75   | 0.08 | 84511 | 91.40 |
| <b>F10.121</b> | 2    | 0.00 | 84513 | 91.40 |
| <b>F10.129</b> | 275  | 0.30 | 84788 | 91.70 |
| <b>F10.14</b>  | 4    | 0.00 | 84792 | 91.70 |
| <b>F10.151</b> | 1    | 0.00 | 84793 | 91.70 |
| <b>F10.159</b> | 1    | 0.00 | 84794 | 91.70 |
| <b>F10.180</b> | 2    | 0.00 | 84796 | 91.71 |
| <b>F10.188</b> | 27   | 0.03 | 84823 | 91.74 |
| <b>F10.19</b>  | 4    | 0.00 | 84827 | 91.74 |
| <b>F10.20</b>  | 3328 | 3.60 | 88155 | 95.34 |
| <b>F10.21</b>  | 1957 | 2.12 | 90112 | 97.46 |
| <b>F10.220</b> | 43   | 0.05 | 90155 | 97.50 |
| <b>F10.221</b> | 1    | 0.00 | 90156 | 97.50 |
| <b>F10.229</b> | 53   | 0.06 | 90209 | 97.56 |
| <b>F10.230</b> | 317  | 0.34 | 90526 | 97.90 |
| <b>F10.231</b> | 32   | 0.03 | 90558 | 97.94 |
| <b>F10.232</b> | 4    | 0.00 | 90562 | 97.94 |
| <b>F10.239</b> | 182  | 0.20 | 90744 | 98.14 |
| <b>F10.24</b>  | 14   | 0.02 | 90758 | 98.15 |
| <b>F10.259</b> | 1    | 0.00 | 90759 | 98.15 |
| <b>F10.26</b>  | 2    | 0.00 | 90761 | 98.16 |
| <b>F10.27</b>  | 3    | 0.00 | 90764 | 98.16 |
| <b>F10.280</b> | 1    | 0.00 | 90765 | 98.16 |
| <b>F10.282</b> | 9    | 0.01 | 90774 | 98.17 |
| <b>F10.288</b> | 4    | 0.00 | 90778 | 98.18 |
| <b>F10.29</b>  | 5    | 0.01 | 90783 | 98.18 |
| <b>F10.920</b> | 32   | 0.03 | 90815 | 98.22 |
| <b>F10.921</b> | 1    | 0.00 | 90816 | 98.22 |
| <b>F10.929</b> | 32   | 0.03 | 90848 | 98.25 |
| <b>F10.94</b>  | 2    | 0.00 | 90850 | 98.25 |
| <b>F10.959</b> | 1    | 0.00 | 90851 | 98.25 |
| <b>F10.97</b>  | 8    | 0.01 | 90859 | 98.26 |
| <b>F10.980</b> | 2    | 0.00 | 90861 | 98.27 |
| <b>F10.99</b>  | 114  | 0.12 | 90975 | 98.39 |
| <b>K70.0</b>   | 17   | 0.02 | 90992 | 98.41 |
| <b>K70.10</b>  | 57   | 0.06 | 91049 | 98.47 |
| <b>K70.11</b>  | 3    | 0.00 | 91052 | 98.47 |

|                |     |      |       |        |
|----------------|-----|------|-------|--------|
| <b>K70.30</b>  | 370 | 0.40 | 91422 | 98.87  |
| <b>K70.31</b>  | 96  | 0.10 | 91518 | 98.98  |
| <b>K70.40</b>  | 20  | 0.02 | 91538 | 99.00  |
| <b>K70.9</b>   | 150 | 0.16 | 91688 | 99.16  |
| <b>O99.312</b> | 4   | 0.00 | 91692 | 99.16  |
| <b>O99.313</b> | 4   | 0.00 | 91696 | 99.17  |
| <b>O99.314</b> | 8   | 0.01 | 91704 | 99.18  |
| <b>V11.3</b>   | 761 | 0.82 | 92465 | 100.00 |
